# Supplementary material for: Structural, optical and magnetic properties of pure and 3d metal dopant-incorporated SnO2 nanoparticles
Source: Royal Society of Chemistry journal article supplement (doi:10.1039/d2ra03691f), 2022-01-01
Supplement: d2ra03691f1.pdf [file d2ra03691f1.pdf]

## **Supplementary information**

### **Structural, Optical and Magnetic Properties of Pure and 3d Metal Dopant Incorporated SnO<sub>2</sub> Nanoparticles**

Supin K K<sup>1</sup>, Anson George<sup>2</sup>, Y. Ranjith Kumar<sup>1</sup>, Thejas K K<sup>2</sup>, Guruprasad Mandal<sup>4</sup>, Anupama chanda<sup>5\*</sup> and  
M. Vasundhara<sup>1, 2, 3\*</sup>

<sup>1</sup>*Polymers and Functional Materials Department, CSIR-Indian Institute of Chemical Technology, Hyderabad-  
500007, Telangana, India.*

<sup>2</sup>*Materials Science and Technology Division, CSIR-National Institute for Interdisciplinary Science and  
Technology, Trivandrum -695 019, Kerala, India.*

<sup>3</sup>*Academy of Scientific and Innovative Research (AcSIR), CSIR-Human Resource Development Centre,  
Ghaziabad, Uttarpradesh, India.*

<sup>4</sup>*Centre for Rural and Cryogenic Technologies, Jadavpur University, Kolkata-700032*

<sup>5</sup>*Department of Physics, Dr Hari Singh Gour Central University, Sagar, India-470003*

\*Corresponding authors: [mvas@iict.res.in](mailto:mvas@iict.res.in), [mvas@niist.res.in](mailto:mvas@niist.res.in), [anupamamatsc@gmail.com](mailto:anupamamatsc@gmail.com)

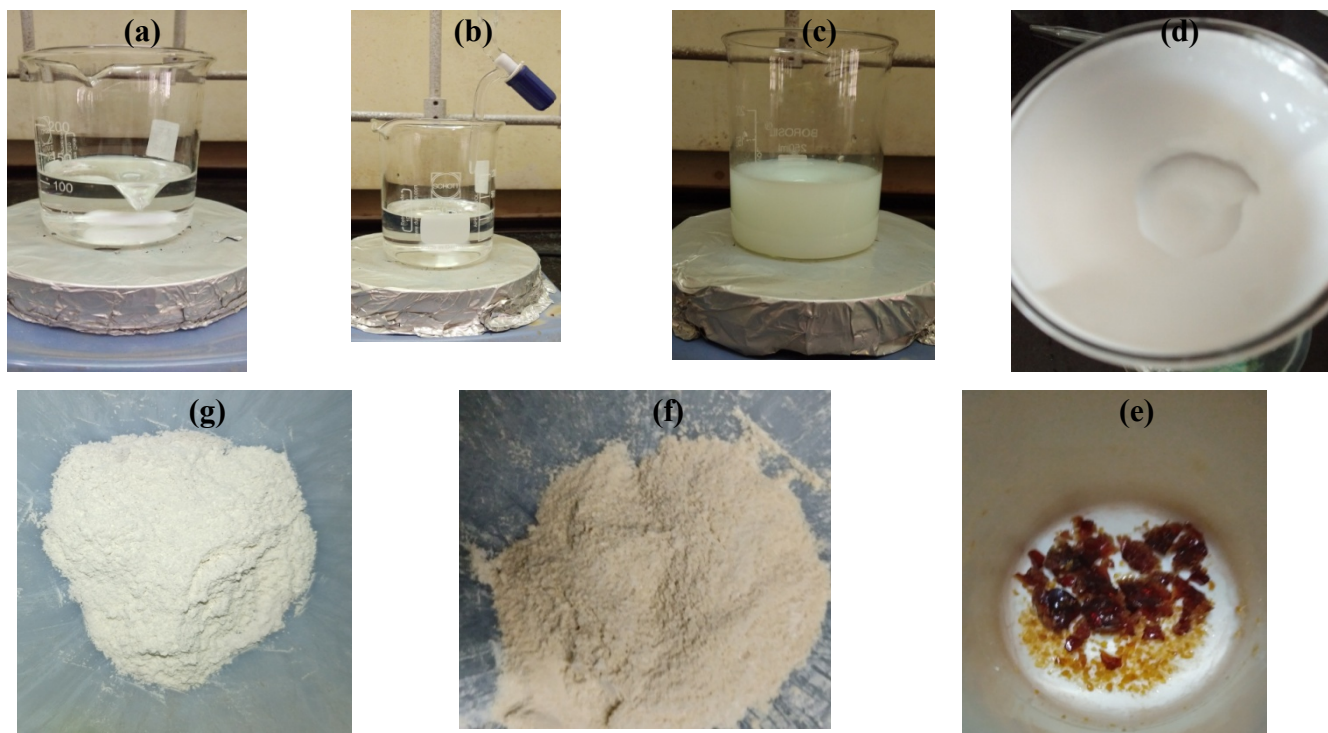

**S Fig. 1:** Stepwise photographic representation of synthesis process of SnO<sub>2</sub> nanoparticles (a) mixed solution of SnCl<sub>4</sub>.5H<sub>2</sub>O and ethylene glycol, (b) & (c) Drop-wise addition of aqueous ammonia under constant magnetic stirring forming the gel (d) gel of SnO<sub>2</sub> nano crystallites after filtration and washing, (e) dried SnO<sub>2</sub> nanoparticles at 150<sup>0</sup>C for 2 h (f) powdered samples of dried SnO<sub>2</sub> and (g) powdered samples calcinated at 400<sup>0</sup>C

(a)

(b)

**S Fig. 2(a):**  
XRD  
patterns of  
Sn-1, Sn-2,  
Sn-4, Sn-6  
and Sn-8  
samples.

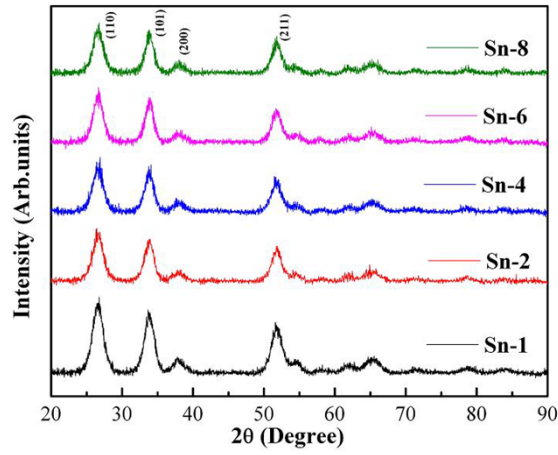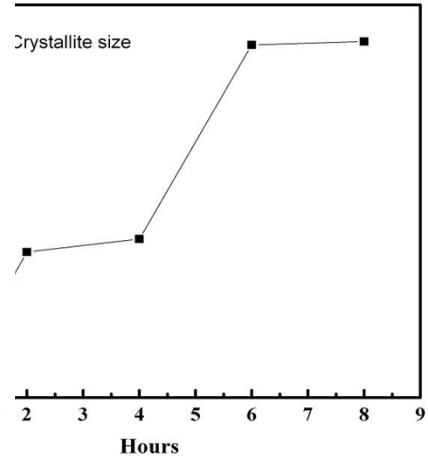

**2(b):**

Variation of crystallite size with

calcinations hours

Variation of crystallite size with calcinations hours

**S Table1:** Refinement parameters obtained for pure and doped SnO<sub>2</sub> nanocrystals.

| <b>Samples</b>                            | <b>Sn-2</b> | <b>SnFe-3</b> | <b>SnCo-3</b> | <b>SnNi-3</b> |
|-------------------------------------------|-------------|---------------|---------------|---------------|
| <b>Refined parameters</b>                 |             |               |               |               |
| <b>Crystal Structure</b>                  | Tetragonal  | Tetragonal    | Tetragonal    | Tetragonal    |
| <b>Space group:</b>                       | P42/mnm     | P42/mnm       | P42/mnm       | P42/mnm       |
| <b>Cell Parameters:</b>                   |             |               |               |               |
| <b><i>a=b</i> (Å<sup>0</sup>)</b>         | 4.7386      | 4.7469        | 4.7408        | 4.7410        |
| <b><i>c</i> (Å<sup>0</sup>)</b>           | 3.1909      | 3.1949        | 3.1893        | 3.1907        |
| <b>Volume (Å<sup>3</sup>)</b>             | 71.6472     | 71.9913       | 71.6801       | 71.7195       |
| <b><math>\alpha= \beta= \gamma</math></b> | 90          | 90            | 90            | 90            |
| <b>Positions:</b>                         |             |               |               |               |
| <b>Sn(x)</b>                              | 0.00000     | 0.00000       | 0.00000       | 0.00000       |
| <b>Sn (y)</b>                             | 0.00000     | 0.00000       | 0.00000       | 0.00000       |
| <b>Sn (z)</b>                             | 0.00000     | 0.00000       | 0.00000       | 0.00000       |
| <b>Fe/Co/Ni(x)</b>                        | -           | 0.00000       | 0.00000       | 0.00000       |
| <b>Fe/Co/Ni(y)</b>                        | -           | 0.00000       | 0.00000       | 0.00000       |
| <b>Fe/Co/Ni (z)</b>                       | -           | 0.00000       | 0.00000       | 0.00000       |
| <b>O (x)</b>                              | 0.29797     | 0.28498       | 0.29126       | 0.28384       |
| <b>O (y)</b>                              | 0.29797     | 0.28498       | 0.29126       | 0.28384       |
| <b>O (z)</b>                              | 0.00000     | 0.00000       | 0.00000       | 0.00000       |
| <b>Density (g/cm<sup>3</sup>)</b>         | 6.608       | 6.435         | 6.416         | 6.598         |
| <b>B<sub>iso</sub>:</b>                   |             |               |               |               |
| <b>Sn</b>                                 | 7.04728     | 7.92788       | 7.91514       | 7.91239       |
| <b>Fe/Co/Ni</b>                           | -           | 7.92788       | 7.91514       | 7.91239       |
| <b>O</b>                                  | 6.93872     | 6.34257       | 7.57134       | 7.52507       |
| <b>Site Occupation:</b>                   |             |               |               |               |
| <b>Sn</b>                                 | 1.0003      | 0.9699        | 0.9705        | 0.9702        |
| <b>Fe/Co/Ni</b>                           | -           | 0.3063        | 0.0300        | 0.0301        |
| <b>O</b>                                  | 1.0478      | 1.0736        | 1.09862       | 1.07522       |
| <b>Agreement factors:</b>                 |             |               |               |               |
| <b>R<sub>p</sub></b>                      | 14.7        | 18.2          | 26.7          | 20.2          |
| <b>R<sub>wp</sub></b>                     | 17.1        | 20.4          | 26.7          | 21.9          |
| <b><math>\chi^2</math></b>                | 1.01        | 1.14          | 1.34          | 1.18          |

**S Table 2.** Brief analysis of high-resolution XPS of O 1s.

| Sample | O 1s spectrum  |          |      |       |
|--------|----------------|----------|------|-------|
|        | Oxygen type    | B.E (eV) | FWHM | Area  |
| Sn-2   | O <sub>L</sub> | 530.95   | 1.41 | 38113 |
|        | OH             | 531.85   | 1.85 | 12989 |
| SnFe-3 | OL             | 531.17   | 1.57 | 2669  |
|        | OH             | 532.67   | 1.47 | 393   |
| SnCo-3 | O <sub>L</sub> | 531.03   | 1.65 | 2926  |
|        | OH             | 532.67   | 1.37 | 365   |
| SnNi-3 | OL             | 530.45   | 1.42 | 3249  |
|        | OH             | 531.85   | 1.51 | 587   |

**S Table 3.** Evaluation of O<sub>v</sub> with respect to parent SnO<sub>2</sub> O 1s spectra.

| Sample | O 1s spectrum  |        |
|--------|----------------|--------|
|        | Oxygen type    | % Area |
| Sn-2   | O <sub>L</sub> | 74.58  |
|        | OH             | 25.42  |
| SnFe-3 | O <sub>L</sub> | 7.00   |
|        | OH             | 3.03   |
|        | O <sub>v</sub> | 89.97  |
| SnCo-3 | O <sub>L</sub> | 7.68   |
|        | OH             | 2.81   |
|        | O <sub>v</sub> | 89.52  |
| SnNi-3 | O <sub>L</sub> | 8.53   |
|        | OH             | 4.52   |
|        | O <sub>v</sub> | 86.95  |
